# Supplementary material for: An IgY Effectively Prevents Goslings from Virulent GAstV Infection
Source: MDPI journal article supplement (doi:10.3390/vaccines10122090), 2022-12-07
Supplement: s1 [file s1]

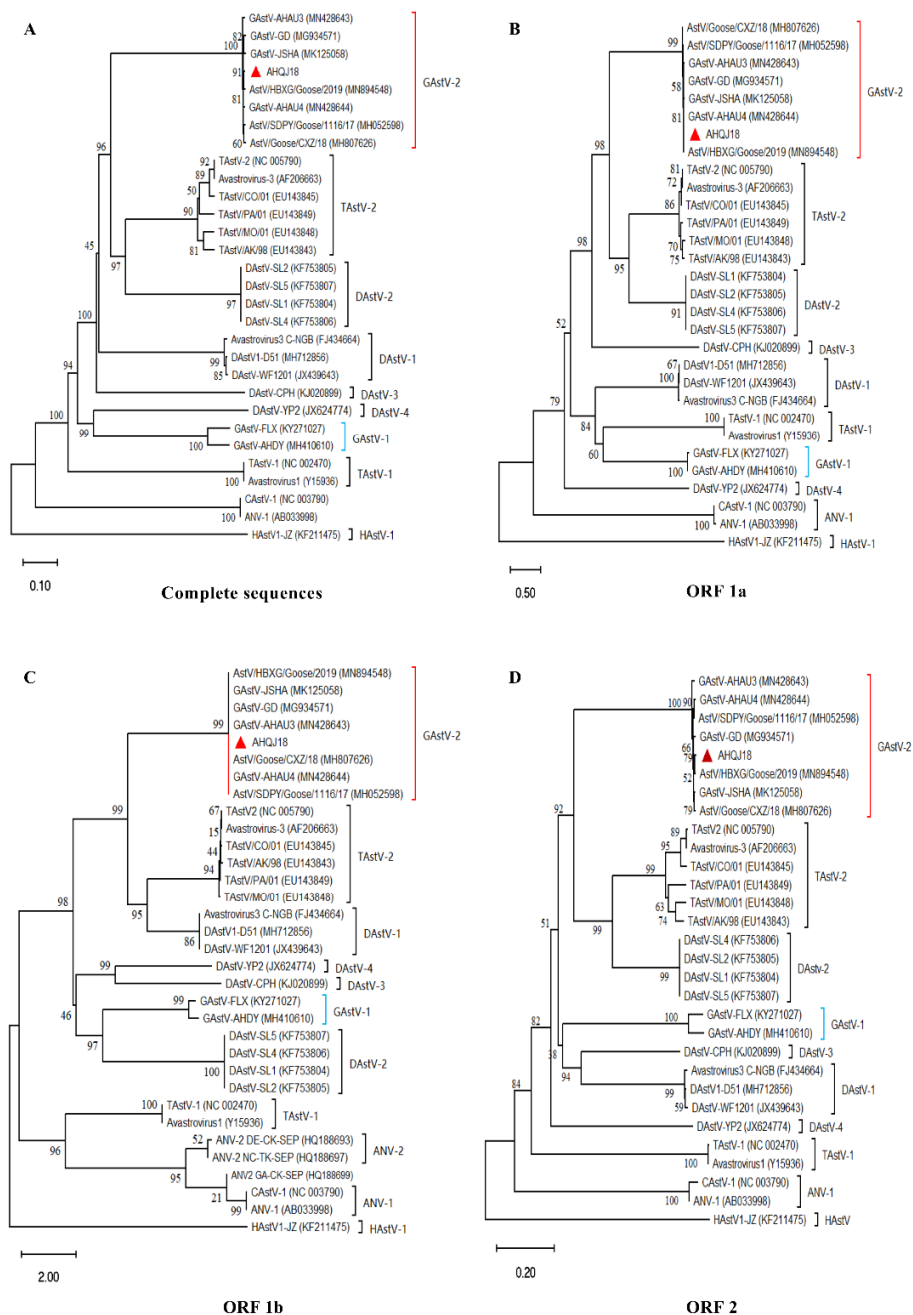

**Figure S1.** Phylogenetic analysis of GAsV-AHQJ18 strain. (A-D) Phylogenetic analysis of Astrovirus based on the whole genome sequences, ORF1a, ORF1b, and ORF2 was constructed using MEGA 11 software, the Neighbor-joining method with 1,000 bootstrap replicates. The GAsV-AHQJ18 strain is marked with a red triangle.

**Table S1.** Summary table of amino acid substitutions in the ORF1a, ORF1b and ORF2 region of GAsV-AHQJ18 strain compared with reference GAsV-2 strains.

| Accessio<br>n no. | Strain                  | ORF1a |    |    |    |    | ORF2 |    |    |    |    |    |    |    |  |
|-------------------|-------------------------|-------|----|----|----|----|------|----|----|----|----|----|----|----|--|
|                   |                         | 52    | 58 | 58 | 90 | 20 | 22   | 25 | 46 | 54 | 59 | 61 | 62 | 69 |  |
|                   |                         | 8     | 0  | 9  | 3  | 8  | 4    | 7  | 4  | 0  | 4  | 4  | 8  | 5  |  |
| MH052598          | AstV/SDPY/Goose/1116/17 | I     | L  | H  | A  | P  | T    | L  | N  | Q  | S  | A  | T  | T  |  |
| OP556137          | GAstV-AHQJ18            | T     | L  | Y  | A  | P  | A    | L  | N  | L  | S  | A  | T  | A  |  |
| MH807626          | AstV/Goose/CXZ/18       | T     | L  | H  | S  | P  | A    | L  | N  | L  | G  | A  | T  | A  |  |
| MN428643          | GAstV-AHAU3             | I     | L  | H  | A  | P  | T    | L  | N  | L  | S  | N  | T  | A  |  |
| MG934571          | GAstV-GD                | I     | A  | H  | A  | P  | A    | L  | A  | L  | N  | A  | I  | A  |  |
| MK125058          | GAstV-JSHA              | I     | L  | H  | A  | P  | A    | L  | A  | L  | N  | A  | T  | A  |  |
| MN428643          | GAstV-AHAU4             | I     | L  | H  | A  | S  | A    | P  | N  | L  | S  | A  | T  | T  |  |

well-recognized mutations compared with classical GAsTV-2.

novel mutations compared to classical GAsTV-2.

**Table S2.** A general overview of protective experiments with anti-GAstV specific-IgY in gosling.

| Content                          | Group | Age       | Immunization <sup>a</sup> |      | Infection <sup>b</sup> |                         | Detection <sup>c</sup>  |
|----------------------------------|-------|-----------|---------------------------|------|------------------------|-------------------------|-------------------------|
|                                  |       |           | Dose (mL)                 | Time | Dose (mL)              | Time                    | Day post inection (DPI) |
| The minimum effective dose       | 1     | 1-day-old | 0.3                       | Day1 | 0.5                    | Day2                    | 4, 8, 12                |
|                                  | 2     | 1-day-old | 0.6                       | Day1 | 0.5                    | Day2                    | 4, 8, 12                |
|                                  | 3     | 1-day-old | 0.9                       | Day1 | 0.5                    | Day2                    | 4, 8, 12                |
|                                  | 4     | 1-day-old | 1.2                       | Day1 | 0.5                    | Day2                    | 4, 8, 12                |
|                                  | 5     | 1-day-old | PBS                       | Day1 | 0.5                    | Day2                    | 4, 8, 12                |
| Prophylactic antiviral treatment | 6     | 1-day-old | 0.9                       | Day2 | 0.5                    | 6 h after immunization  | 4, 8, 12                |
|                                  | 7     | 1-day-old | 0.9                       | Day2 | 0.5                    | 12 h after immunization | 4, 8, 12                |
|                                  | 8     | 1-day-old | 0.9                       | Day2 | 0.5                    | 1 d after immunization  | 4, 8, 12                |
|                                  | 9     | 1-day-old | 0.9                       | Day2 | 0.5                    | 3 d after immunization  | 4, 8, 12                |
|                                  | 10    | 1-day-old | 0.9                       | Day2 | 0.5                    | 5 d after immunization  | 4, 8, 12                |
|                                  | 11    | 1-day-old | 0.9                       | Day2 | 0.5                    | 7 d after immunization  | 4, 8, 12                |

|                          |    |           |         |                     |     |                         |          |
|--------------------------|----|-----------|---------|---------------------|-----|-------------------------|----------|
|                          | 12 | 1-day-old | 0.9     | Day2                | 0.5 | 9 d after immunization  | 4, 8, 12 |
|                          | 13 | 1-day-old | PBS 0.9 | Day2                | 0.5 | 6 h after immunization  | 4, 8, 12 |
|                          | 14 | 1-day-old | PBS 0.9 | Day2                | 0.5 | 12 h after immunization | 4, 8, 12 |
|                          | 15 | 1-day-old | PBS 0.9 | Day2                | 0.5 | 1 d after immunization  | 4, 8, 12 |
|                          | 16 | 1-day-old | PBS 0.9 | Day2                | 0.5 | 3 d after immunization  | 4, 8, 12 |
|                          | 17 | 1-day-old | PBS 0.9 | Day2                | 0.5 | 5 d after immunization  | 4, 8, 12 |
|                          | 18 | 1-day-old | PBS 0.9 | Day2                | 0.5 | 7 d after immunization  | 4, 8, 12 |
|                          | 19 | 1-day-old | PBS 0.9 | Day2                | 0.5 | 9 d after immunization  | 4, 8, 12 |
| Post-infection treatment | 20 | 1-day-old | 0.9     | After infection     | 0.5 | Day 1                   | 4, 8, 12 |
|                          | 21 | 1-day-old | 0.9     | 1 d after infection | 0.5 | Day 1                   | 4, 8, 12 |
|                          | 22 | 1-day-old | 0.9     | 3 d after infection | 0.5 | Day 1                   | 4, 8, 12 |
|                          | 23 | 1-day-old | 0.9     | 5 d after infection | 0.5 | Day 1                   | 4, 8, 12 |
|                          | 24 | 1-day-old | 0.9     | none                | 0.5 | Day 1                   | 4, 8, 12 |

<sup>a</sup>At different days of age or post infection of goslings subcutaneously with the anti-GAstV IgY at a concentration of 2.79mg/ml. <sup>b</sup>Different days of age or post immunization of goslings subcutaneously with 105.84TCID<sub>50</sub> GAstV-AHQJ18 strain. <sup>c</sup>4, 8, and 12 days post infection.
